# Supplementary material for: Key Care Provision Aspects That Affect Care Transition in the Long-Term Care Systems: Preliminary Review Findings
Source: MDPI journal article supplement (doi:10.3390/ijerph19116402), 2022-05-24
Supplement: s1 [file s1]

## Supplementary File S2

**Figure. Stages of the selection process**

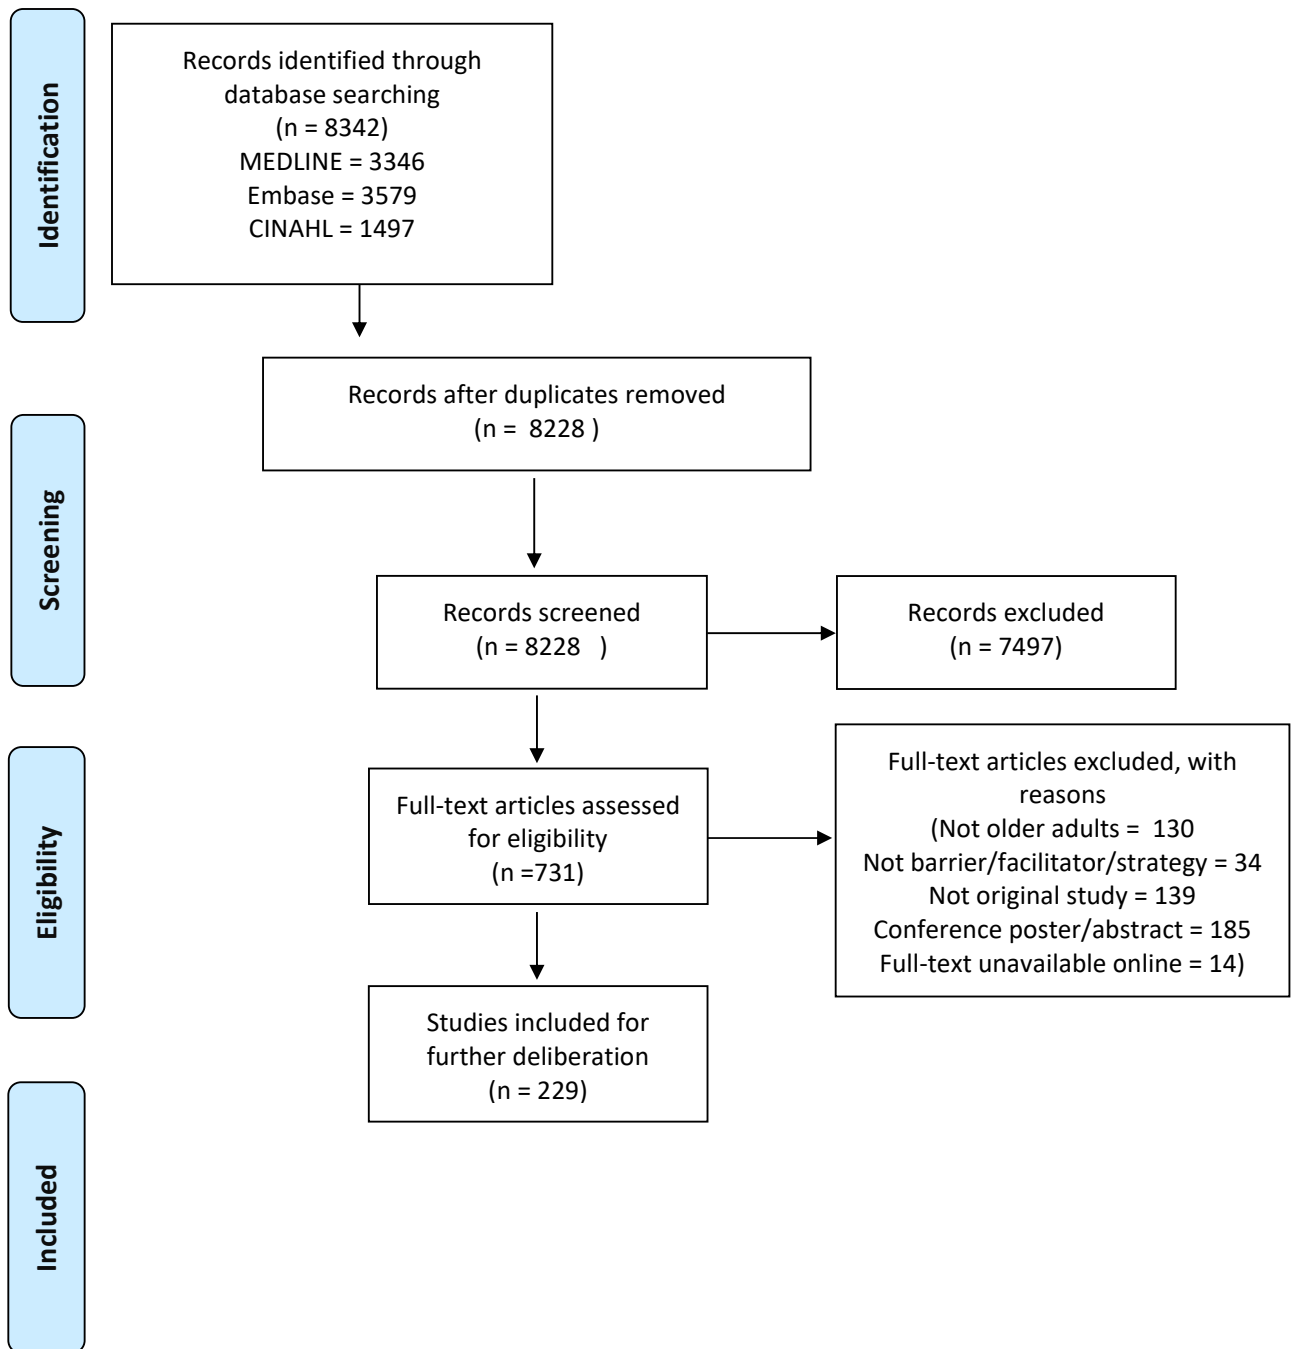

**Based on:** Moher D, Liberati A, Tetzlaff J, Altman D, The PRISMA Group. Preferred Reporting Items for Systematic Reviews and Meta-Analyses: The PRISMA Statement. PLoS Medicine. 2009;6(7).
