# Supplementary material for: Key Care Provision Aspects That Affect Care Transition in the Long-Term Care Systems: Preliminary Review Findings
Source: MDPI journal article supplement (doi:10.3390/ijerph19116402), 2022-05-24
Supplement: s1 [file s1]

Supplementary File S3

Table S2. Publications per year per category\*

| Category                                            | Year |      |      |      |      |      |      |      |      |      |      |      |      |      |      |      | Total        |
|-----------------------------------------------------|------|------|------|------|------|------|------|------|------|------|------|------|------|------|------|------|--------------|
|                                                     | 2005 | 2006 | 2007 | 2008 | 2009 | 2010 | 2011 | 2012 | 2013 | 2014 | 2015 | 2016 | 2017 | 2018 | 2019 | 2020 |              |
| <b>Organizational - General</b>                     |      |      |      |      |      |      |      |      |      |      |      |      |      |      |      |      | <b>270**</b> |
| Coordination of resources                           | 2    | 3    | 7    | 2    | 2    | 2    | 3    | 7    | 7    | 9    | 6    | 7    | 10   | 14   | 9*   | *    | <b>90</b>    |
| Transfer of information and care responsibility     | 4    | 0    | 4    | 2    | 3    | 3    | 7    | 4    | 2    | 4    | 2    | 5    | 4    | 7    | 0*   | *    | <b>51</b>    |
| Communication of health professionals               | 2    | 2    | 2    | 1    | 2    | 1    | 4    | 1    | 7    | 2    | 3    | 2    | 4    | 2    | 1*   | *    | <b>36</b>    |
| Training and education of staff                     | 3    | 2    | 2    | 4    | 3    | 3    | 5    | 4    | 4    | 3    | 1    | 4    | 6    | 6    | 0*   | *    | <b>24</b>    |
| Opinions health professionals                       | 1    | 1    | 1    | 0    | 1    | 0    | 3    | 2    | 2    | 2    | 1    | 4    | 1    | 1    | 2*   | *    | <b>22</b>    |
| Education and involvement of the patient and family | 0    | 0    | 1    | 0    | 1    | 2    | 3    | 1    | 2    | 2    | 2    | 1    | 0    | 2    | 1*   | *    | <b>18</b>    |
| Opinions patients and family                        | 1    | 0    | 1    | 1    | 0    | 0    | 1    | 2    | 3    | 0    | 2    | 1    | 2    | 2    | 1*   | *    | <b>17</b>    |
| E-health                                            | 0    | 1    | 1    | 0    | 0    | 1    | 1    | 2    | 1    | 1    | 1    | 1    | 2    | 0    | 0*   | *    | <b>12</b>    |
| <b>Organizational – Disease/Condition Specific</b>  |      |      |      |      |      |      |      |      |      |      |      |      |      |      |      |      | <b>33**</b>  |
| Coordination of resources                           | 1    | 0    | 0    | 1    | 0    | 1    | 1    | 0    | 1    | 4    | 2    | 1    | 0    | 1    | 0*   | *    | <b>12</b>    |
| Education and involvement of the patient and family | 0    | 0    | 0    | 0    | 0    | 1    | 1    | 0    | 1    | 1    | 0    | 1    | 0    | 0    | 0*   | *    | <b>5</b>     |
| Opinions health professionals                       | 0    | 0    | 0    | 0    | 0    | 0    | 0    | 1    | 0    | 0    | 1    | 0    | 0    | 2    | 0*   | *    | <b>4</b>     |
| Opinions patients and family                        | 0    | 2    | 0    | 0    | 0    | 0    | 0    | 0    | 1    | 0    | 0    | 0    | 1    | 0    | 0*   | *    | <b>4</b>     |
| Communication of health professionals               | 0    | 0    | 0    | 0    | 0    | 1    | 1    | 0    | 0    | 0    | 0    | 0    | 0    | 1    | 0*   | *    | <b>3</b>     |
| Training and education of staff                     | 0    | 0    | 0    | 0    | 0    | 0    | 0    | 0    | 0    | 0    | 1    | 1    | 0    | 0    | 0*   | *    | <b>2</b>     |
| E-health                                            | 0    | 0    | 0    | 0    | 0    | 1    | 0    | 0    | 0    | 0    | 0    | 0    | 1    | 0    | 0*   | *    | <b>2</b>     |
| Transfer of information and care responsibility     | 0    | 0    | 0    | 0    | 0    | 0    | 1    | 0    | 0    | 0    | 0    | 0    | 0    | 0    | 0*   | *    | <b>1</b>     |
| <b>Financial aspects</b>                            |      |      |      |      |      |      |      |      |      |      |      |      |      |      |      |      |              |
| Provider payment mechanisms/ rewards/ penalties     | 1    | 0    | 1    | 0    | 0    | 1    | 2    | 0    | 1    | 2    | 2    | 2    | 3    | 1    | *    | *    | <b>16</b>    |
| <b>Social aspects</b>                               |      |      |      |      |      |      |      |      |      |      |      |      |      |      |      |      |              |
| <b>Social aspects</b>                               | 2    | 3    | 1    | 1    | 0    | 0    | 1    | 2    | 0    | 0    | 0    | 3    | 2    | 3    | 2*   | *    | <b>18</b>    |

\*Search was conducted in March 2020. Therefore, the list of publications for year 2019 and 2020 may be incomplete.

\*\*Some publications were mentioned in more than one category (for example they discussed coordination of resources and education and involvement of the patient and family)
